# Supplementary material for: Considering consumer quality preferences, who should offer trade- in between manufacturer and retail platform?
Source: Research Square preprint supplement (doi:10.21203/rs.3.rs-7259178/v1), 2025-08-06
Supplement: Supplementary file 1 [file b1cdca71d5160d8a18cdc6a8.docx]

**Appendix**

Proof of Proposition 1.

The differential game model for Model M is modelled as follows:

(A.1)

We use inverse induction to show that, according to Bellman's theory of continuous-type dynamic programming, for any state, there exists a continuously differentiable function, which satisfies the following Hamilton-Jacobi-Bellman (abbreviated as HJB) equation:

(A.2)

Where is the optimal value function of the retail platform under model M, represents the profit of the retail platform in the whole operation plan period, and B is the first-order derivative of the optimal value function of the retail platform with respect to the perceived quality of the product, which represents the impact of the unit change of the perceived quality of the product on the profit of the retail platform. The HJB equation of the retail platform under the Model M shown in equation (A.2) indicates that the retail platform will not only consider the immediate profit, but also consider the impact of the decision on the dynamic change of the perceived quality of the product and its impact on the long-term interests of the enterprise when making the decision, therefore, the optimal decision is a far-sighted decision that considers the immediate interests of the enterprise and the long-term interests of the enterprise that are affected by the perceived quality of the product. Considering that the model is a differential game problem with infinite planning horizon, for the sake of notational simplicity, the following solution procedure omits the time variable.In the Model M, the retail platform does not make any decisions on the quality of their products. In Model M, the retail platform does not make decisions, so there is no reaction function. Next, the manufacturer's HJB equation is constructed:

(A.3)

where is the manufacturer's optimal value function under Model M, and is the first-order derivative of the manufacturer's optimal value function with respect to the perceived quality of the product, reflecting the impact of a unit change in the perceived quality of the product on the manufacturer's profit. Equation (A.3) also reflects the manufacturer's decision to take into account both immediate benefits and long-term benefits under the influence of environmental goodwill. Based on the first-order optimality conditions at the right-hand end of the middle equation of Eq. (A.3), the optimal decision for the manufacturer's quality-improvement inputs and retail price can be obtained as follows:

(A.4)

It can be found that the manufacturer's optimal decisions are all functions of the perceived quality of the product, which reflects the manufacturer's visionary decisions based on the perceived quality of the product. Substituting Eq. (A.4) into the HJB equations for the manufacturer and the platform, the following set of HJB equations is obtained:

(A.5)

Based on the relationship between the value functions at the left and right ends of Eq. (A.5) and the perceived quality of the product, it is assumed that the optimal value functions of the manufacturer and the platform, respectively, satisfy the following relationship:

(A.6)

where, denote the coefficients to be determined for the optimal value functions of the manufacturer and the retail platform, respectively, and is a constant. Substituting equation (A.6) into the HJB system of equations (A.5), the constant relationship can be obtained as follows:

(A.7)

Based on the left and right ends of equation (A.7) as a function of the perceived quality of the product, the following specific expressions for the constant coefficients to be determined can be obtained:

(A.8)

To further obtain the time trajectory of product perceived quality, equation (A.8) is substituted into equation (A.4) to obtain the expression about the relevant decision, and further substituted into the kinetic equation of product perceived quality to obtain the first order differential equation of product perceived quality as follows:

(A.9)

Solving equation (A.9) yields the optimal time path for the perceived quality of the product under Model M:

(A.10)

where, denotes the steady state of perceived product quality in the M-mode, and substituting (A.10) into (A.6) yields the optimal decisions of the manufacturer and retail platform:

(A.11)

Bringing equation (A.11) into (A.1) gives the market demand at this point as:

(A.12)

When demand is 0, solve for the highest consumer willingness to pay as:

(A.13)

Consumer surplus and social welfare at this point are:

(A.14)

Proposition 1 is proved. █

Proof of Proposition 2.

The differential game model for Model I is modelled as follows:

(A.15)

We use the inverse induction method, which requires us to first solve for the response decision of the retail platform. According to Bellman's continuous dynamic programming theory, for any state , there exists a continuously differentiable function that satisfies the following Hamilton-Jacobi-Bellman (abbreviated as HJB) equation:

(A.16)

Where is the optimal value function of the retail platform under Model I, which represents the profit of the retail platform in the whole operation plan period, and is the first-order derivative of the optimal value function of the retail platform with respect to the perceived quality of the product, which represents the impact of the change of the perceived quality unit of the product on the profit of the retail platform. The HJB equation of the retail platform under Model I shown in Equation (A.13) indicates that the retail platform will not only consider the immediate profit, but also consider the impact of the decision on the dynamic change of the perceived quality of the product and its impact on the long-term interests of the enterprise when making the decision, therefore, the optimal decision is a far-sighted decision that considers the immediate interests of the enterprise and the long-term interests of the enterprise that are affected by the perceived quality of the product. Considering that the model is a differential game problem with infinite planning period, the time variable is omitted in the following solution process for the sake of notational simplicity. According to the first-order optimality condition at the right end of equation (A.16), the response function for the retail platform decision can be obtained as follows:

(A.17)

Eq. (A.17) is further substituted into the manufacturer's goal function to obtain the manufacturer's HJB equation according to Bellman's continuous dynamic programming method as follows:

(A.18)

where is the manufacturer's optimal value function under Model I, and is the first-order derivative of the manufacturer's optimal value function with respect to the perceived quality of the product, which reflects the impact of a unit change in the perceived quality of the product on the manufacturer's profit. Equation (A.18) also reflects the manufacturer's decision to consider both immediate benefits and long-term benefits under the influence of environmental goodwill. Based on the first-order optimality conditions at the right-hand end of the middle equation of Eq. (A.18), the optimal decision for the manufacturer's quality improvement inputs and wholesale price can be obtained as follows:

(A.19)

It can be found that the manufacturer's optimal decisions are all functions of the perceived quality of the product, which reflects the manufacturer's far-sighted decisions based on the perceived quality of the product. Substituting equation (A.19) into the response function (A.17) of the platform strategy, the retail price decision of the platform is obtained as:

(A.20)

Similarly, from equation (A.20), the optimal strategy of the retail platform is also a function of the perceived quality of the product, i.e., the retail platform bases its far-sighted pricing decision on the feedback of the perceived quality of the product. To further obtain the optimal value functions of the manufacturer and the retail platform as well as the specific expressions for the perceived quality of the product, Eqs. (A.19) and (A.20) are substituted into the HJB equations of the manufacturer and the platform, respectively, to obtain the following set of HJB equations:

(A.21)

Based on the relationship between the value functions at the left and right ends of equation (A.21) and the perceived quality of the product, it is assumed that the optimal value functions of the manufacturer and the platform, respectively, satisfy the following relationship:

(A.22)

where, denote the coefficients to be determined for the optimal value functions of the manufacturer and the retail platform, respectively, and i is a constant. Substituting equation (A.22) into the HJB system of equations (A.21), the constant relationship can be obtained as follows:

(A.23)

Based on the left and right ends of Eq. (A.23) as a function of the perceived mass of the product, the following specific expression for the constant coefficient to be determined is obtained:

(A.24)

To further obtain the time trajectory of the perceived quality of the product, Eq. (A.24) is substituted into Eq. (A.19) to obtain the expression about the relevant decision and further substituted into the kinetic equation of the perceived quality of the product to obtain the first order differential equation of the perceived quality of the product as follows:

(A.25)

Solving Eq. (A.25) yields the optimal time path for the perceived quality of the product under Model I:

(A.26)

where, denotes the steady state of perceived product quality in Model I. Substituting (A.26) into (A.19) and (A.20) yields the optimal decisions of the manufacturer and the retail platform:

(A.27)

Bringing (A.27) into (A.15) gives the market demand at this point:

(A.28)

Solve for the highest consumer willingness to pay when demand is 0:

(A.29)

Consumer surplus and social welfare at this point are:

(A.30)

Proposition 2 is proved. █

Proof of Proposition 3.

Known that,

if ,

that is ,then.

And if ,

that is ,then .

Since ,the comparison is the same as v.s..

Known that ,and

then .

Proposition 3 is proved. █

Proof of Proposition 4.

Known that ,and

then .

Known that ,

if ,

that is ,

then .

And if ,

that is ,then .

Known that ,

if ,

that is ,

then .

And if ,

that is ,then .

Proposition 4 is proved. █

Proof of Proposition 5.

Proposition 5 is proved. █

Proof of extended model 7.1.

Pragmatic consumers Trade-in demand for:

(A.31)

Innovative consumers Trade-in demand for:

(A.32)

The differential game model for Model M is modeled as follows:

(A.33)

The differential game model for Model I is modeled as follows:

(A.34)

The proof of the extended model is similar to the core model.

The equilibrium results of model M are as follows:

(A.35)

(A.36)

The equilibrium results of model I are as follows:

(A.37)

(A.38)

Extended model 7.1. is proved. █

Proof of extended model 7.2.

The differential game model for Model M is modeled as follows:

(A.39)

The differential game model for Model I is modeled as follows:

(A.40)

The proof of the extended model is similar to the core model.

The equilibrium results of model M are as follows:

(A.41)

(A.42)

The equilibrium results of model I are as follows:

(A.43)

(A.44)

Extended model 7.2. is proved. █
